19 **Abstract**

20 The outbreak of Corona Virus Disease 2019 caused by the severe acute respiratory  
21 syndrome coronavirus (SARS-CoV-2) is highly transmitted. The potential  
22 extra-respiratory transmission routes remain uncertain. Five rhesus macaques were  
23 inoculated with  $1 \times 10^6$  TCID<sub>50</sub> of SARS-CoV-2 via conjunctival (CJ), intratracheal  
24 (IT), and intragastric (IG) routes, respectively. Remarkably, the CJ  
25 inoculated-macaques developed mild interstitial pneumonia and viral load was  
26 detectable in the conjunctival swabs at 1 days post-inoculation (dpi). Only via IT  
27 inoculation, viral load was detected in the anal swab at 1-7 dpi and macaque showed  
28 weight loss. However, viral load was undetectable after IG inoculation. Comparatively,  
29 viral load was higher in the nasolacrimal system but lesions of lung were relatively  
30 mild and local via CJ inoculation compared with that via IT inoculation,  
31 demonstrating distinct characteristics of virus dispersion. Both the two routes affected  
32 the alimentary tract. Therefore the clinicians need to protect eye while working with  
33 patients.

34

35 **Introduction**

36 Corona Virus Disease 2019 (COVID-19) is highly infectious and transmitted mainly  
37 through human-to-human transmission via respiratory droplets when direct or close  
38 contact with the patients with SARS-CoV-2. The other potential transmission routes  
39 remain to be further researched. In some clinical cases, samples of tears and  
40 conjunctival secretions from both SARS-CoV<sup>1</sup> and SARS-CoV-2 patients with

41 conjunctivitis<sup>1</sup> displayed detectable viral RNA. A previous study reported the case of a  
42 clinician who was infected with SARS-CoV-2 while working with patients under all  
43 safeguards except eye protection<sup>3</sup>. By contrast, no SARS-CoV-2 could be detected by  
44 RT-PCR in 114 conjunctival swabs samples from patients with COVID-19 pneumonia  
45<sup>4</sup>. The potential extra-respiratory portals that SARS-CoV-2 enter the host need to be  
46 further research by laboratory-confirmation for providing significant data to oversight  
47 and prevention for healthcare workers.

48

## 49 **Results**

50 Five rhesus macaques between the ages of 3 and 5 years were inoculated with  $1 \times 10^6$   
51 TCID<sub>50</sub> of SARS-CoV-2 via three routes by ocular conjunctival inoculation (CJ-1 and  
52 CJ-2), intragastrical inoculation (IG-1 and IG-2), and intratracheal inoculation (IT-1)  
53 regarded as a comparison to compare the distributions and pathogenesis of viruses  
54 after enter the host via different routes (Figure 1).

55

56 We daily observed the macaques for clinical signs. There was no significant change in  
57 the body weight (Figure 2A) in the CJ and IG inoculated macaques and the  
58 temperature (Figure 2B) in all the inoculated macaques, while the weight loss was  
59 obvious in the IT inoculated macaques and dropped about 125 g at 5 dpi. Routine  
60 specimens, including nasal and throat swabs, were collected on 0, 1, 3, 5, and 7-day  
61 post-inoculation (dpi). Additionally, to explore the potentially excretory routes of  
62 SARS-CoV-2 in the host, the conjunctival and anal swabs were also gathered.

63 Specifically, CJ and IT inoculated animals were able to detect a continued viral load  
64 in their nasal and throat swabs from 1 to 7 dpi. In contrast, the virus was not detected  
65 in any swabs from the IG inoculated macaques. Notably, only via the CJ route, viral  
66 load can be tested in conjunctival swabs (average, approximately  $4.33 \log_{10}$  RNA  
67 copies/mL) on 1 dpi and then became undetectable implying that the  
68 inoculated-SARS-CoV-2 may be transferred from the initial entry-conjunctiva to  
69 respiratory tract and other tissues. Meanwhile, only via the IT route, viral load can be  
70 ongoing examined in the anal swabs on 1-7 dpi and reached the peak about  $6.76 \log_{10}$   
71 RNA copies/mL on 5 dpi, revealing distinct excretory pathways of host after  
72 inoculation via different routes (Figure 2C).

73

74 To determine the distribution of virus and histological lesions, CJ-1, IT-1, and IG-1  
75 were euthanized and necropsied on 7 dpi. For CJ-1, viral load was primarily  
76 distributed in the nasolacrimal system and ocular, including the lacrimal gland ( $3.93$   
77  $\log_{10}$  RNA copies/mL), optic nerve ( $1.03 \log_{10}$  RNA copies/mL), and conjunctiva  
78 ( $1.01 \log_{10}$  RNA copies/mL); in the nose, including the nasal mucosa ( $6.25 \log_{10}$  RNA  
79 copies/mL), nasal turbinate ( $6.63 \log_{10}$  RNA copies/mL), and nostril ( $1.03 \log_{10}$  RNA  
80 copies/mL); in the pharynx including epiglottis ( $4.57 \log_{10}$  RNA copies/mL), soft  
81 palate ( $5.60 \log_{10}$  RNA copies/mL); in the oral cavity including cheek pouch ( $1.03$   
82  $\log_{10}$  RNA copies/mL) and parotid gland ( $1.04 \log_{10}$  RNA copies/mL); as well as in  
83 other tissues including lower left lobe of lung ( $4.6 \log_{10}$  RNA copies/mL), tonsil ( $4.51$   
84  $\log_{10}$  RNA copies/mL), inguinal ( $1.01 \log_{10}$  RNA copies/mL) and pararectal ( $6.25$

85  $\log_{10}$  RNA copies/mL) lymph node, stomach (4.61  $\log_{10}$  RNA copies/mL), duodenum  
86 (4.66  $\log_{10}$  RNA copies/mL), ileum (1.08  $\log_{10}$  RNA copies/mL) and caecum (1.06  
87  $\log_{10}$  RNA copies/mL) (Figure 1d). By contrast, for IT-1, the distribution of virus  
88 might be somewhat different owing to viral replication was highly in different lobes  
89 of the lung ( $10^{4.22}$  to  $10^{7.81}$  copies/mL), and viral load was also widely detected in the  
90 nasal septum (4.69  $\log_{10}$  RNA copies/mL), tracheas (6.61  $\log_{10}$  RNA copies/mL),  
91 mandibular lymph node (4.26  $\log_{10}$  RNA copies/mL), tonsil (5.17  $\log_{10}$  RNA  
92 copies/mL), pulmonary lymph node (3.39  $\log_{10}$  RNA copies/mL), and some segments  
93 of the alimentary tract including duodenum (1.97  $\log_{10}$  RNA copies/mL), ileum (4.93  
94  $\log_{10}$  RNA copies/mL), colon (1.11  $\log_{10}$  RNA copies/mL), and caecum (4.25  $\log_{10}$   
95 RNA copies/mL) (Figure 2D). The distinct distributions of viruses by different  
96 inoculation routes were consistent with the anatomical structure, suggesting that the  
97 dispersion of SARS-CoV-2 into the host associated with the infection route.  
98 Furthermore, viruses were detectable in different segments of the alimentary canal  
99 and some lymphatic tissues via both inoculation routes revealing that they may play  
100 important roles in the spread of the virus within the host<sup>5</sup>. There were no significant  
101 histopathological changes in IG-1. Furthermore, the specific IgG antibody against  
102 SARS-CoV-2 was detectable in the CJ-2 at 14 and 21 dpi compared to before  
103 infection proofing that the animal was infected with SARS-CoV-2 (Figure 2E).

104

105 Meanwhile, comparison with prior to infection (day 0), the chest radiographs from  
106 CJ-1 revealed obscure lung markings and opaque glass sign in the bilateral upper

107 lobes and the right lower lobe of the lung on 7 dpi. By comparison, IT-1 developed  
108 obviously increased radiographic changes on 7 dpi, exhibiting vessel convergence  
109 sign, obscure lung markings, marked ground-glass opacities, obscures costophrenic  
110 angle in the bilateral lobes of the lung, and patchy lesions in the right lower lobe of  
111 the lung (Figure 3A). Consistent with the radiographic alteration, microscopically,  
112 local lesions in the lungs from the CJ-1 displayed mild interstitial pneumonia  
113 characterized by widened alveolar interstitium, infiltration of inflammatory cells  
114 primarily including lymphocytes and monocytes, a small amount of exudation in the  
115 alveolar cavities (Figure 3B). Virus antigen was further confirmed by the  
116 SARS-CoV-2-specific antibody via immunohistochemistry (IHC) stain. In the  
117 damaged lobe of lungs, SARS-CoV-2 was predominantly observed in the alveolar  
118 epithelium and exfoliated-degenerative cellular debris in the alveolar cavities (Figure  
119 3B) both in CJ-1 and IT-1. Notably, the results of IHC were highly in accordance with  
120 the data of viral load detection on 7 dpi both in the CJ-1 and IT-1. Specifically, viral  
121 antigens were scattered in several cells in the nasolacrimal system via conjunctival  
122 inoculation, while they were more prominent in the trachea via intratracheal  
123 inoculation (Figure 4). Moreover, viral antigen was obviously observed in the lamina  
124 propria of alimentary tract suggesting that the virus may spread from the initial entry  
125 to gut-associated lymphoid tissue (Supplementary Figure 1), and they were relatively  
126 slight detected in the kidney, myocardium, and liver in IT-1 but undetectable in CJ-1.  
127 (Supplementary Figure 2). Briefly, animal inoculated via conjunctival route gave  
128 evidence of relatively mild and local interstitial pneumonia compared to the

129 intratracheal inoculated-macaque which demonstrated moderate, diffuse lesions in the  
130 lung accompanied with more infiltration of inflammatory cells and accumulation of  
131 exudation in the alveolar cavities.

132

133 These data demonstrated that macaques can be infected with SARS-CoV-2 via the  
134 conjunctival route rather than the intragastric route. Compared to the intratracheal  
135 route, viral load was comparatively high in the nasolacrimal system and lesions in the  
136 lung were relatively mild and local via the conjunctival route. Similarly, both the two  
137 routes can affect the alimentary canal.

138

## 139 **Discussion**

140 We inoculated rhesus monkeys via a single route via conjunctiva, intra-stomach, or  
141 intra-trachea, to avoid multiple routes of co-inoculation for confirming the exact  
142 pathway of inoculation. These results suggest that conjunctiva is a potential portal for  
143 viral transmission. In our results, viral load was detectable in several nasolacrimal  
144 system associated-tissues, especially in the conjunctiva, lacrimal gland, nasal cavity  
145 and throat, which drew the outline of the anatomical bridge between ocular and  
146 respiratory tissues. Particularly, the lacrimal duct functions as a conduit to collect and  
147 transport tear fluid from the ocular surface to the nasal-inferior meatus, being  
148 convenient for the drainage of virus from ocular to respiratory tract tissues. Actually,  
149 the previous report had demonstrated that although virus-containing fluid can be taken  
150 up through the conjunctiva, sclera, or cornea, the majority of liquid including tear and

151 secretions is drained into the nasopharyngeal space or swallowed; the lacrimal duct  
152 epithelia are also possible to contribute to the absorption of tear fluid. Our results  
153 were highly consistent with the anatomical features that viruses enter the host via the  
154 conjunctival route. On the other hand, previous research demonstrated that  
155 SARS-CoV was undetectable in cynomolgus monkeys after intragastric inoculation  
156 which consistent with our result. At present, still, no evidence could prove that  
157 SARS-CoV-2 can transmission via fecal-oral route<sup>5</sup>, although viral RNA of  
158 SARS-CoV-2 was prolonged detectable in fecal samples from patients<sup>6</sup> and in anal  
159 swabs from the infected macaques.

160

161 Respiratory viruses have the capability to stimulate ocular complications in infected  
162 patients, which then leads to respiratory infection<sup>7</sup>. The fact that exposed mucous  
163 membranes and unprotected eyes increased the risk of SARS-CoV<sup>1</sup> or SARS-CoV-2<sup>2</sup>  
164 transmission suggests that healthcare professionals need to increase the awareness of  
165 eye protection in close contact with the patients or in crowded places.

166

## 167 **Methods**

### 168 **Ethics statement**

169 The animal biosafety level 3 (ABSL3) facility in the Institute of Laboratory Animal  
170 Science was used to complete all the experiments with rhesus macaques. All research  
171 was performed in compliance with the Animal Welfare Act and other regulations  
172 relating to animals and experiments. The Institutional Animal Care and Use  
173 Committee of the Institute of Laboratory Animal Science, Peking Union Medical



174 College, reviewed and authorized all the programs in this research including animals  
175 (BLL20001).

176

### 177 **Cells and viruses**

178 The SARS-CoV-2 named SARS-CoV-2/WH-09/human/2020/CHN was isolated by  
179 the Institute of Laboratory Animal Science, Peking Union Medical College. Vero  
180 cells were applied to the reproduction of SARS-CoV-2 stocks. Dulbecco's modified  
181 Eagle's medium (DMEM, Invitrogen, Carlsbad, USA) were applied to incubate this  
182 cell line at 37°C, 5% CO<sub>2</sub>, complemented with 10% fetal bovine serum (FBS), 100  
183 µg/ml streptomycin, and 100 IU/ml penicillin, and maintained. Titers for  
184 SARS-CoV-2 were resolved by TCID<sub>50</sub> assay.

185

### 186 **RNA extraction and RT-PCR**

187 All the collected-organs were applied to extract Total RNA as the description in the  
188 previous report. Briefly, the RNeasy Mini Kit from Qiagen, Hilden, Germany and the  
189 PrimerScript RT Reagent Kit from TaKaRa, Japan were used following manufacturer  
190 instructions. RT-PCR reactions were applied to the PowerUp SYBG Green Master  
191 Mix Kit from Applied Biosystems, USA, following cycling protocol: 50°C for 30 min,  
192 followed by 40 cycles at 95°C for 15 min, 94°C for 15 s, and 60°C for 45 s. The  
193 primer sequences used for RT-PCR were targeted against the envelope (E) gene of  
194 SARS-CoV-2. The forward primer is 5'-TCGTTTCGGAAGAGACAGGT-3', the  
195 reverse primer is 5'-GCGCAGTAAGGATGGCTAGT-3'.

196

### 197 **Animal experiments**

198 Five male rhesus macaques (*Macaca Mulatta*) between the ages of 3 and 5 years were  
199 used in this research. All were negative for tuberculosis and simian immunodeficiency  
200 virus. They were inoculated with  $1 \times 10^6$  50% tissue-culture infectious doses (TCID<sub>50</sub>)  
201 of SARS-CoV-2 via three routes. Two male rhesus macaques were inoculated with  
202  $10^6$  TCID<sub>50</sub>/ml SARS-CoV-2 via ocular conjunctival route named CJ-1 and CJ-2, one  
203 was inoculated via intratracheal route named IT-1, two were inoculated via  
204 intragastric route in sequence named IG-1 and IG-2, respectively. Prior to sample  
205 collection, all animals were anesthetized with ketamine hydrochloride (10 mg/kg). On  
206 0, 1, 3, 5, and 7 dpi, the conjunctival, nasal, throat and anal swabs were collected and  
207 incubated in 1 ml DMEM with 50 µg/ml streptomycin and 50 U/ml penicillin. The  
208 IPTT-300 temperature probes, which were injected interscapular into the macaques  
209 prior to the start of the experiment, were applied to do temperature monitor every day.  
210 CJ-1, IT-1, and IG-1 were euthanized and necropsied on 7 dpi. Tissues were collected  
211 as followed, conjunctiva, lacrimal gland, optic nerve, cerebellum, cerebrum, different  
212 segments of the spinal cord, nostril, nasal turbinate, nasal mucosa, nasal septum, soft  
213 palate, cheek pouch, parotid gland, epiglottis, lingual tonsil, pharyngeal tonsil,  
214 different lobes of lung, trachea, different lymph nodes, heart, liver, spleen, pancreas,  
215 different segments of the alimentary canal, kidney, bladder, testis, and brown adipose  
216 tissues samples for detecting the viral loads to analysis the virus distributions. All sera  
217 were collected on 0, 7, 14 and 21 dpi for serologic detection to exam whether there  
218 presence the IgG antibodies reactive with SARS-CoV-2 antigens.

219

## 220 **Preparation of Homogenate Supernatant**

221 An electric homogenizer was applied to prepare tissues homogenates by 2 min 30s  
222 incubated in 1ml of DMEM. The homogenates were centrifuged at 3,000 rpm at 4°C  
223 for 10 min. The supernatant was harvested and repositied for viral titer at -80°C.

224

#### 225 **ELISA antibody assay**

226 Sera of Each animal were collected to detect the SARS-CoV-2 antibody through  
227 enzyme-linked immunosorbent assay (ELISA) on 0, 7, 14 and 21 dpi. The 96-well  
228 plates coated with 0.1µg Spike protein of SARS-CoV-2 from Sino Biological (Product  
229 code: 40591-V08H) at 4°C overnight were blocked by 2% BSA/PBST at room  
230 temperature for 1 hour. Sera samples were diluted at 1:100, and then were added to  
231 different wells and maintained at 37 °C for 30 minutes, followed by the goat  
232 anti-monkey antibody labeled with horseradish peroxidase (Abcam, ab112767)  
233 incubated at room temperature for 30 minutes. The reaction was determined at 450  
234 nm.

235

#### 236 **Hematoxylin and Eosin Staining**

237 Ten percent buffered formalin solution fixed all the collected organs, and paraffin  
238 sections (3-4µm in thickness) were prepared according to routine practice. All the  
239 tissue sections were stained with Hematoxylin and Eosin. The histopathological  
240 changes of different tissues were observed under an Olympus microscope.

241

#### 242 **Immunohistochemistry (IHC)**

243 Ten percent buffered formalin solution fixed all the collected organs, and paraffin  
244 sections (3-4 µm in thickness) were prepared routinely as the description in the  
245 previous report. Briefly, an antigen retrieval kit (AR0022, Boster) was applied to the

246 sections at 37°C for 1 min. Three percent H<sub>2</sub>O<sub>2</sub> in methanol and were fulfilled to  
247 quench for endogenous peroxidases for 10 min. The slices were incubated at 4°C  
248 overnight with a laboratory prepared-7D2 monoclonal antibody after blocking in one  
249 percent normal goat serum. HRP-labeled goat anti-mouse IgG secondary antibody  
250 from ZDR-5307, Beijing ZSGB Biotechnology were maintained at 37°C for 60 min.  
251 The 3,30-diaminobenzidine tetrahydrochloride was treated to make the results visual.  
252 The sections were counterstained with hematoxylin, dehydrated and mounted on a  
253 slide and observed by the Olympus microscope. The sequential sections from all  
254 collected tissues were directly incubated with HRP-labeled goat anti-mouse IgG were  
255 used as the omission control of viral antigen staining. The sequential sections from all  
256 collected tissues were incubated with a recombinant anti-Mouse IgG antibody  
257 [RM104] (ab190475, Abcam) performed as the negative control for the expression of  
258 viral antigen.

259

### 260 **Statistical analysis**

261 All data were analyzed by GraphPad Prism 8.0 software. Statistically significant  
262 differences were determined using Welch's *t*-tests. A two-sided *p* value < 0.05 was  
263 considered statistically significant. \**P* < 0.05, \*\**P* < 0.01, \*\*\**P* < 0.001.

264

### 265 **Acknowledgments**

266 This work was supported by the National Key Research and Development Project of  
267 China (Grant No. 2016YFD0500304), CAMS initiative for Innovative Medicine of  
268 China (Grant No. 2016-I2M-2-006), National Mega projects of China for Major  
269 Infectious Diseases (Grant No. 2017ZX10304402).

270

271 **Authors Contributions**

272 Conceptualization: C.Q.; Methodology: C.Q., W.D., L.L.B., H.G., Z.G.X., Y.J.Q.,  
273 Z.Q.S.; Investigation: W.D., L.L.B., H.G., Z.G.X., Y.J.Q., Z.Q.S., S.R.G., J.Y.L.,  
274 J.N.L., P.Y., F.F.Q., Y.F.X., F.L.L., C.X., Q.L., J.X., Q.W., M.Y.L., G.P.W., S.Y.W.,  
275 H.S.Y., X.L., W.J.Z., Y.L.H., C.Q.; Writing – Original Draft: Z.Q.S. and J.X. ; Writing  
276 –Review and Editing: C.Q. ; Funding Acquisition: C.Q. and L.L.B. ; Resources: C.Q.;  
277 Supervision: C.Q.

278

279 **Competing interests**

280 The authors have no competing interests to declare.

281

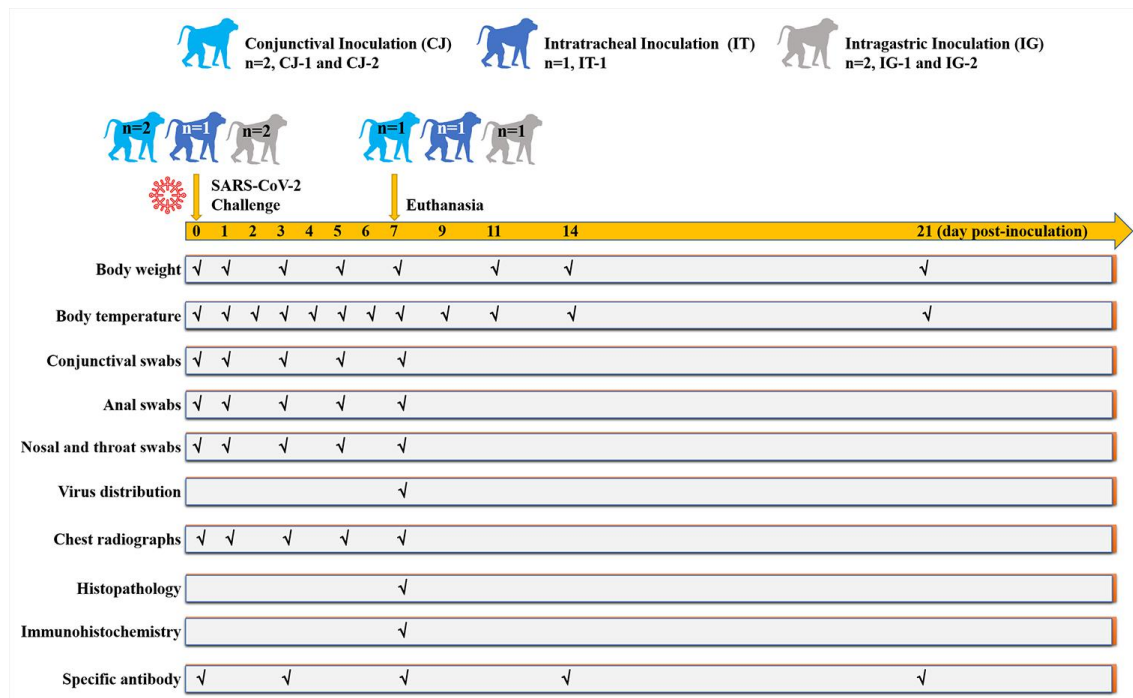

282

283 **Fig. 1 Graphic outline of experimental design and sample collection.** Five male  
 284 rhesus macaques (*Macaca Mulatta*) between the ages of 3 and 5 years were  
 285 inoculated with  $10^6$  TCID<sub>50</sub>/ml SARS-CoV-2. Two rhesus macaques via ocular  
 286 conjunctival route named CJ-1 and CJ-2, one was inoculated via intratracheal route  
 287 named IT-1, two were inoculated via intragastric route in sequence named IG-1 and  
 288 IG-2, respectively. The macaques were observed daily for clinical signs (body weight  
 289 and temperature were tested as shown). On 0, 1, 3, 5, and 7 dpi, the conjunctival, nasal,  
 290 throat and anal swabs were collected. CJ-1, IT-1, and IG-1 were euthanized and  
 291 necropsied on 7 dpi. Tissues were collected to analysis the virus distributions. All sera  
 292 were collected on 0, 7, 14 and 21 dpi for serologic detection to exam the  
 293 SARS-CoV-2 specific IgG antibodies.

294

295

296

297

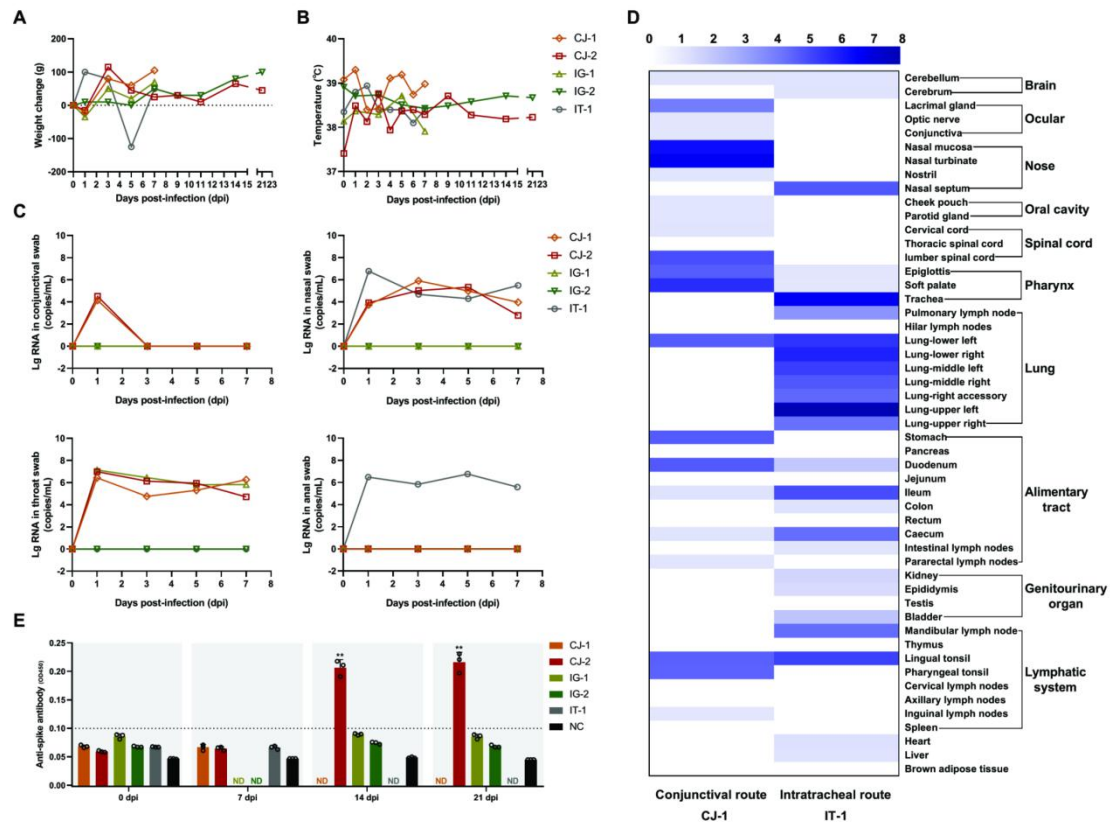

298

299 **Fig. 2 Clinical features, viral distributions and antibody detection in the sera**  
 300 **from the rhesus macaques inoculated with SARS-CoV-2 via three routes.**

301 Clinical signs including body weight (A) and temperature (B) were observed. The  
 302 viral load of the conjunctival, nasal, throat, and anal swabs specimens (C) from the  
 303 five inoculated macaques on 0, 1, 3, 5, and 7 dpi. The comparison of viral  
 304 distributions in the majority of organs and tissues (D) from CJ-1 and IT-1 on 7 dpi.  
 305 The darker the blue color, the higher the viral load. The specific IgG antibody against  
 306 SARS-CoV-2 in the sera of the inoculated-macaques were tested by ELISA on 0, 7,  
 307 14, and 21 dpi (E). According to unpaired Welch's *t*-test, the specific IgG antibody in  
 308 the sera of conjunctival inoculated macaque exhibited a significant increase compared  
 309 with prior to inoculation (\*\* $p=0.0027$ ) and 21 dpi (\*\* $p=0.0039$ ). CJ-1 and CJ-2 were  
 310 the two macaques that inoculated via conjunctival route, IT-1 was the macaque that  
 311 inoculated via intratracheal route. IG-1 and IG-2 were the two macaques that



312 inoculated via intragastric route. ND, not detected. NC, negative control (unpaired  
313 Welch's *t*-test,  $**p < 0.01$ ).

314

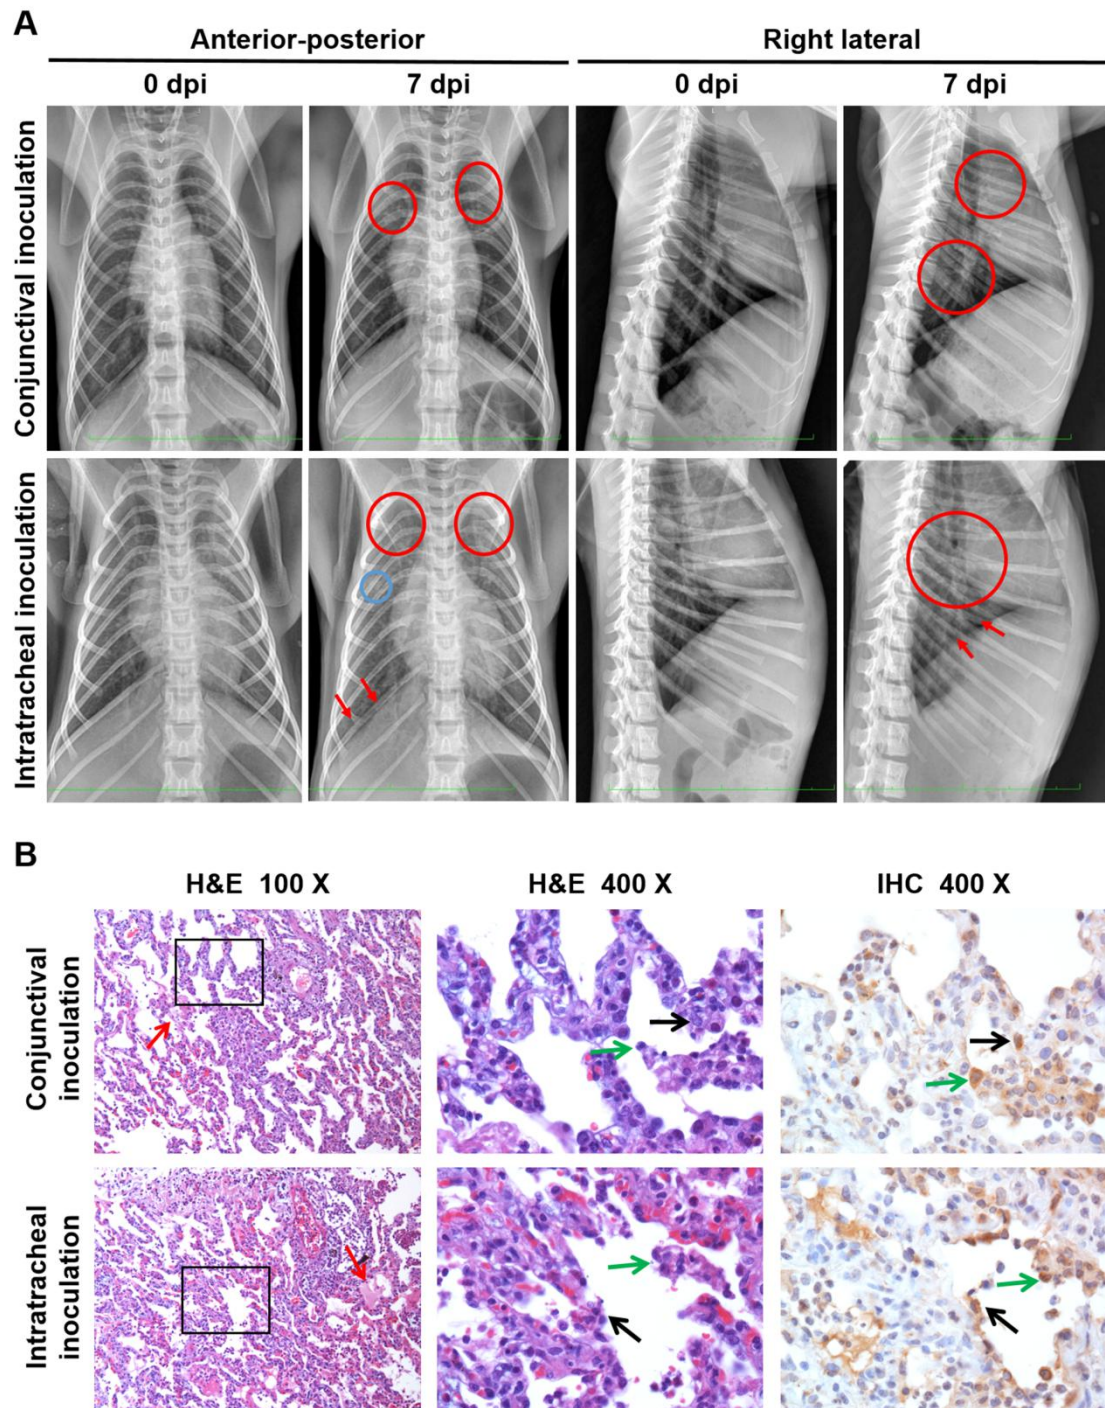

315

316 **Fig. 3 Compare the lesions in lungs from CJ-1 and IT-1 by radiographic**

317 **alterations, histopathological and Immunohistochemical observation.**



318 The anterior-posterior and right lateral chest radiographs (A) from rhesus macaque  
319 imaged prior to SARS-CoV-2 inoculation (day 0) and 7 dpi. Areas of interstitial  
320 infiltration, indicative of pneumonia, are highlighted (red circle); obscures  
321 costophrenic angle (red arrows); patchy lesions (blue circle). Positional indicators are  
322 included (R=right). The histopathological and immunohistochemical observations in  
323 the lungs (B). Both the two macaques exhibited interstitial pneumonia with thickened  
324 alveolar septa, filtration of inflammatory cells mainly including lymphocytes and  
325 macrophages, some amounts of exudation (red arrows) in the alveolar cavities on 7dpi.  
326 Conjunctival route caused relatively mild pneumonia. The sequential sections were  
327 stained by HE and IHC, respectively. The viral antigens were observed primarily in  
328 the alveolar epithelia (black arrows) and the detached-degenerative cellular debris  
329 (green arrows). The H&E stained-sections under 400 magnification were the  
330 fractionated gain (black frame) of these sections under 100 magnification. The IHC  
331 section showed the same field with the black frame section under 400 magnification.  
332 Black scale bar = 100  $\mu\text{m}$ , red scale bar = 50  $\mu\text{m}$ .

333

334

335

336

337

338

339

340

341

342

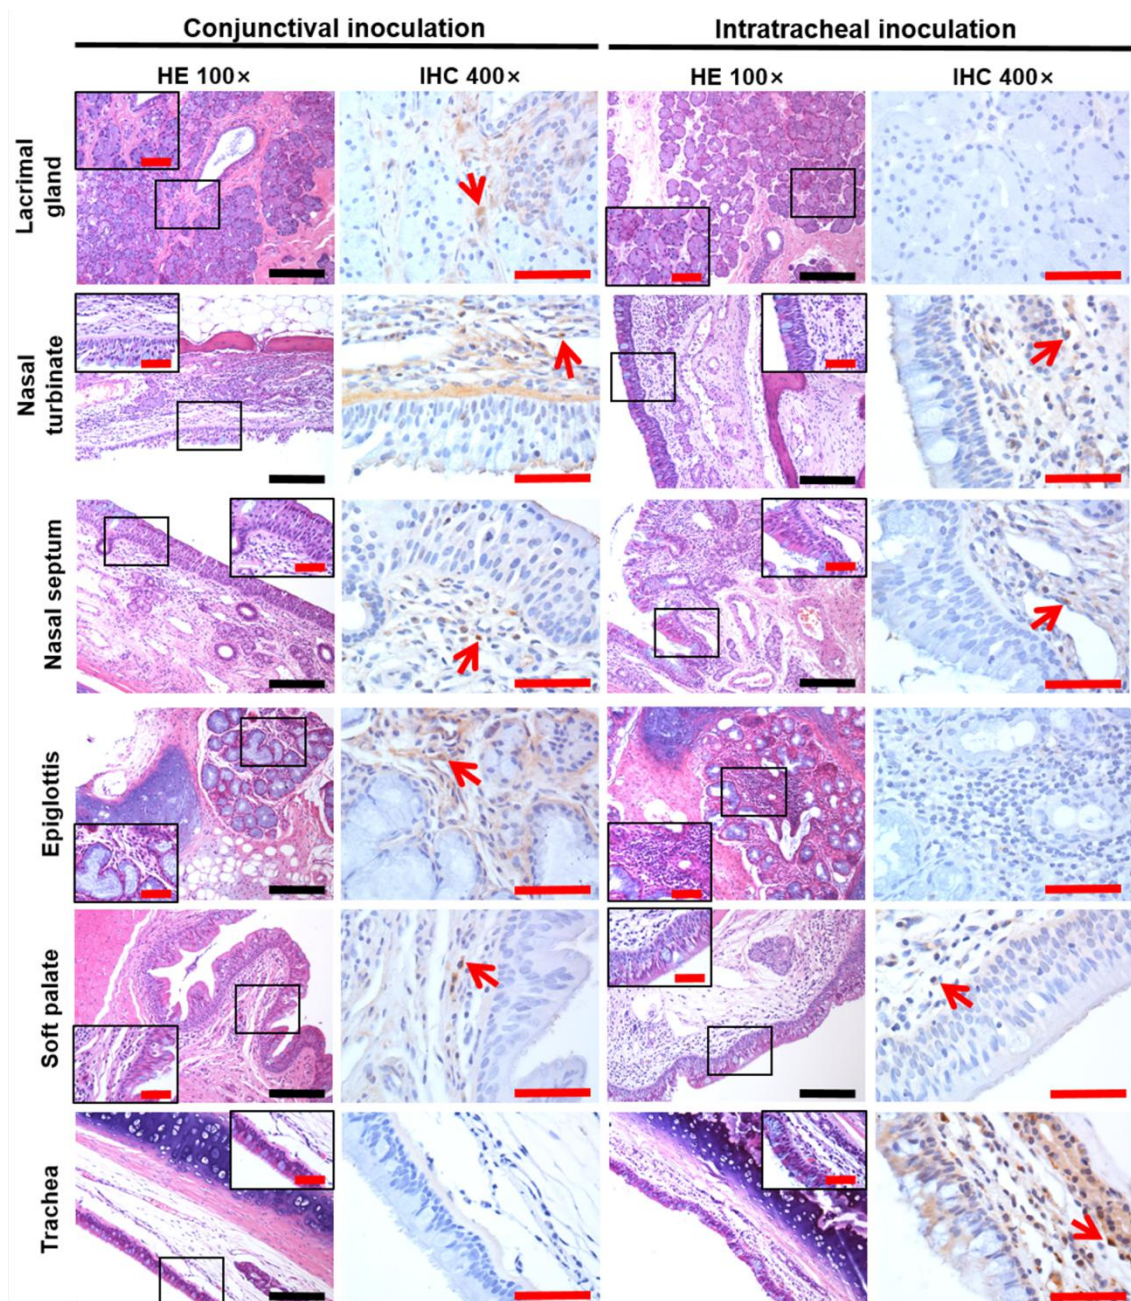

343

344 **Fig. 4 The distinct distributions of viruses by different inoculation routes**  
345 **between CJ-1 and IT-1 were consistent with the anatomical structure.**

346 The organs and tissues from the nasolacrimal system and the conductive system of the  
347 respiratory tract, including lacrimal gland, nasal turbinate, nasal septum, epiglottis,  
348 soft palate, and trachea were examined. The sequential sections were stained by HE  
349 and IHC, respectively. The field in the black frame was the fractionated gain of the  
350 HE slide. The IHC section showed the same field with the black frame section under



351 400 magnification. Black scale bar = 100  $\mu$ m, red scale bar = 50  $\mu$ m.

352

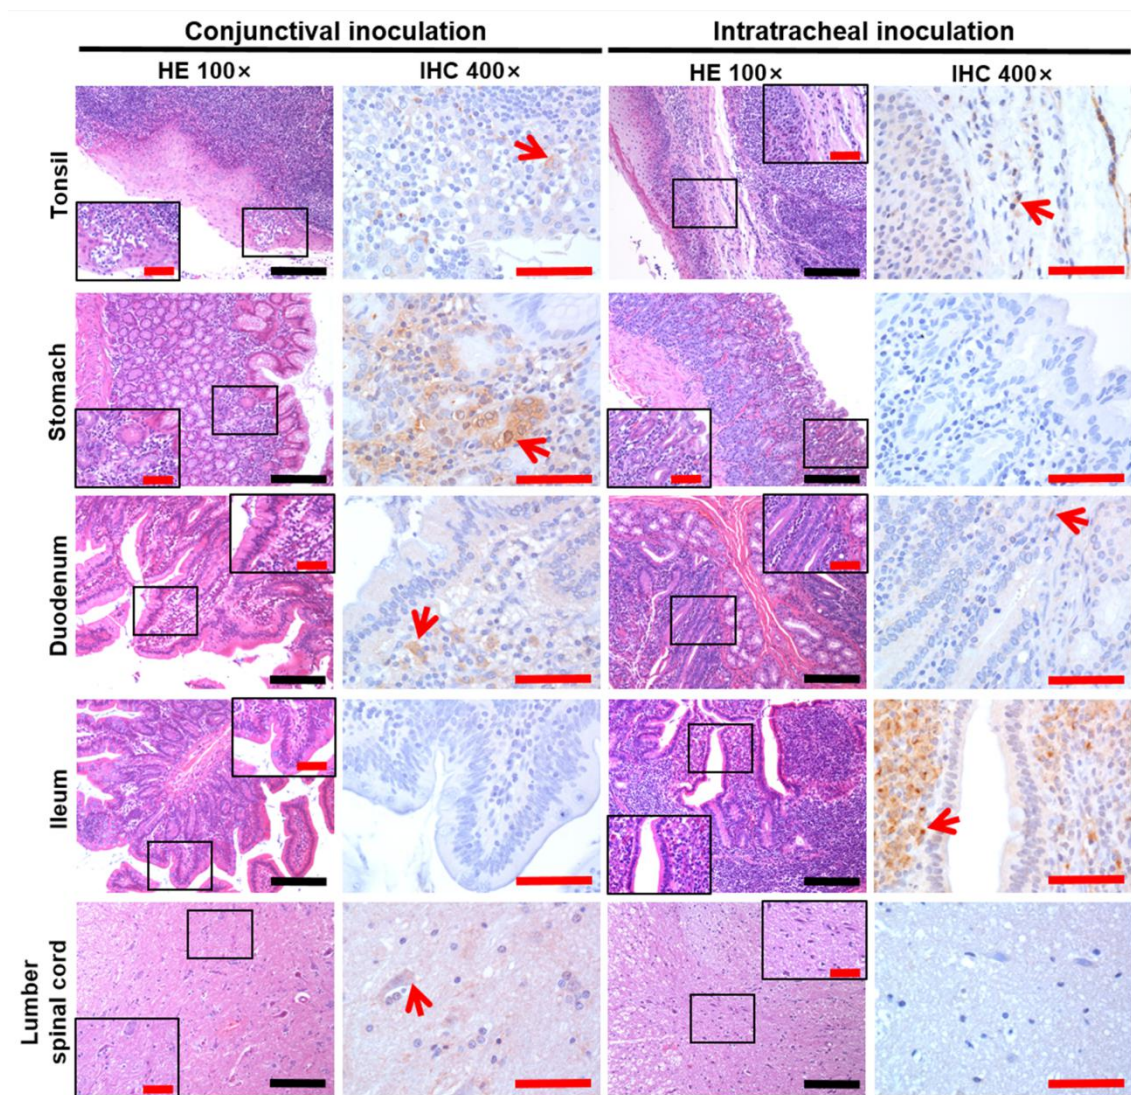

353

354 **Supplementary Figure 1. The comparison of viral distributions in the tonsil, the**  
355 **alimentary tract including stomach, duodenum, and ileum, and the lumbar**  
356 **spinal cord between CJ-1 and IT-1.**

357 The sequential sections were stained by HE and IHC, respectively. The field in the  
358 black frame was the fractionated gain of the HE slide. The IHC section showed the  
359 same field with the black frame section under 400 magnification. Black scale bar =  
360 100  $\mu$ m, red scale bar = 50  $\mu$ m.

361

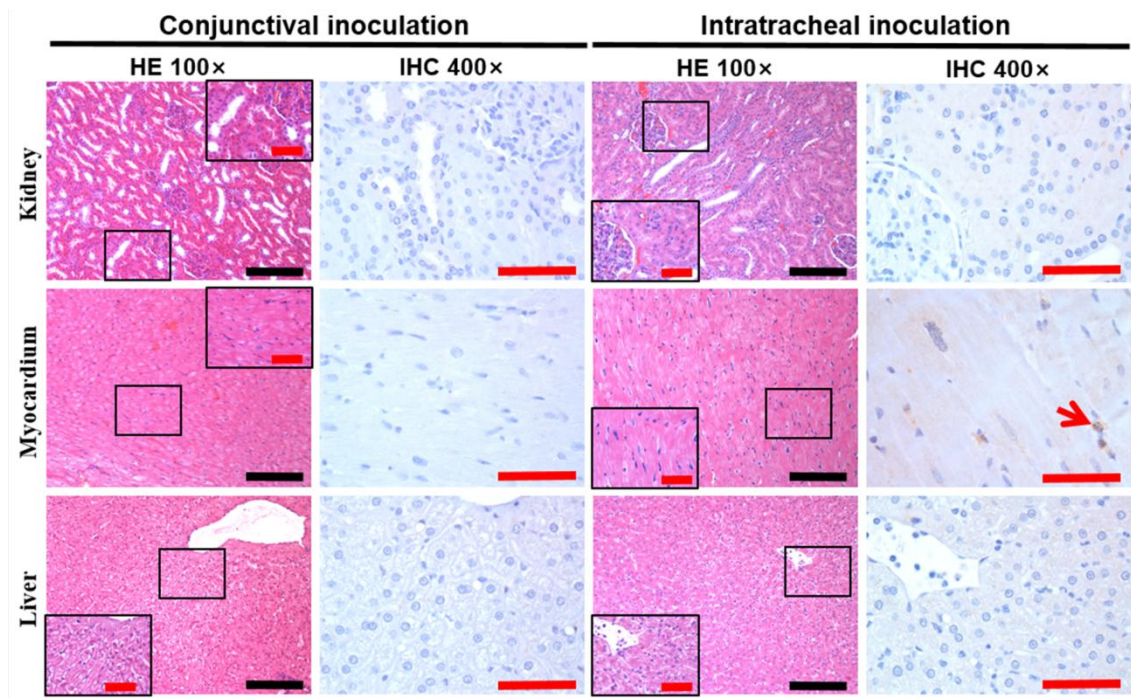

362

363 **Supplementary Figure 2. Slight viral antigen was detected in the kidney, heart,**  
364 **and liver in the IT-1 and that was negative in CJ-1.**

365 The sequential sections were stained by HE and IHC, respectively. The field in the  
366 black frame was the fractionated gain of the HE slide. The IHC section showed the  
367 same field with the black frame section under 400 magnification. The field in the red  
368 frame was the fractionated gain of the IHC slide. Black scale bar = 100  $\mu\text{m}$ , red scale  
369 bar = 50  $\mu\text{m}$ .

370 **References:**

371 <sup>1</sup> Chan, W. M. *et al.*, Tears and conjunctival scrapings for coronavirus in patients with SARS. *BRIT*  
372 *J OPTHALMOL* **88** 968 (2004).

373 <sup>2</sup> Xia, J., Tong, J., Liu, M., Shen, Y. & Guo, D., Evaluation of coronavirus in tears and conjunctival  
374 secretions of patients with SARS - CoV - 2 infection. *J MED VIROL* (2020).

375 <sup>3</sup> Lu, C., Liu, X. & Jia, Z., 2019-nCoV transmission through the ocular surface must not be ignored.  
376 *The Lancet* **395** e39 (2020).

377 <sup>4</sup> Deng, C. *et al.*, Ocular Detection of SARS-CoV-2 in 114 Cases of COVID-19 Pneumonia in  
378 Wuhan, China: An Observational Study. *China: An Observational Study (2/19/2020)* (2020).

379 <sup>5</sup> Nagata, N. *et al.*, Pathology and virus dispersion in cynomolgus monkeys experimentally infected  
380 with severe acute respiratory syndrome coronavirus via different inoculation routes. *INT J EXP*  
381 *PATHOL* **88** 403 (2007).

382 <sup>6</sup> Wu, Y. *et al.*, Prolonged presence of SARS-CoV-2 viral RNA in faecal samples. *The Lancet*  
383 *Gastroenterology & Hepatology* (2020).

384 <sup>7</sup> Belser, J. A., Rota, P. A. & Tumpey, T. M., Ocular tropism of respiratory viruses. *Microbiol. Mol.*  
385 *Biol. Rev.* **77** 144 (2013).

386
